# Supplementary material for: Interaction of the ionic liquid [BMP][TFSA] with rutile TiO2(110) and coadsorbed lithium
Source: Royal Society of Chemistry journal article supplement (doi:10.1039/c5cp07433a), 2016-01-01
Supplement: c5cp07433a1.pdf [file c5cp07433a1.pdf]

## Supporting Information

### Interaction of the ionic liquid [BMP][TFSA] with rutile $\text{TiO}_2(110)$ and coadsorbed lithium

Benedikt Uhl<sup>1,2</sup>, Maral Hekmatfar<sup>1,2</sup>, Florian Buchner<sup>1,2</sup> and

R. Jürgen Behm<sup>1,2,\*</sup>

<sup>1</sup> Institute of Surface Chemistry and Catalysis, Ulm University, Albert-Einstein-Allee 47,  
D-89081 Ulm, Germany

<sup>2</sup> Helmholtz-Institute Ulm (HIU) Electrochemical Energy Storage, Helmholtzstr. 11,  
D-89081 Ulm, Germany

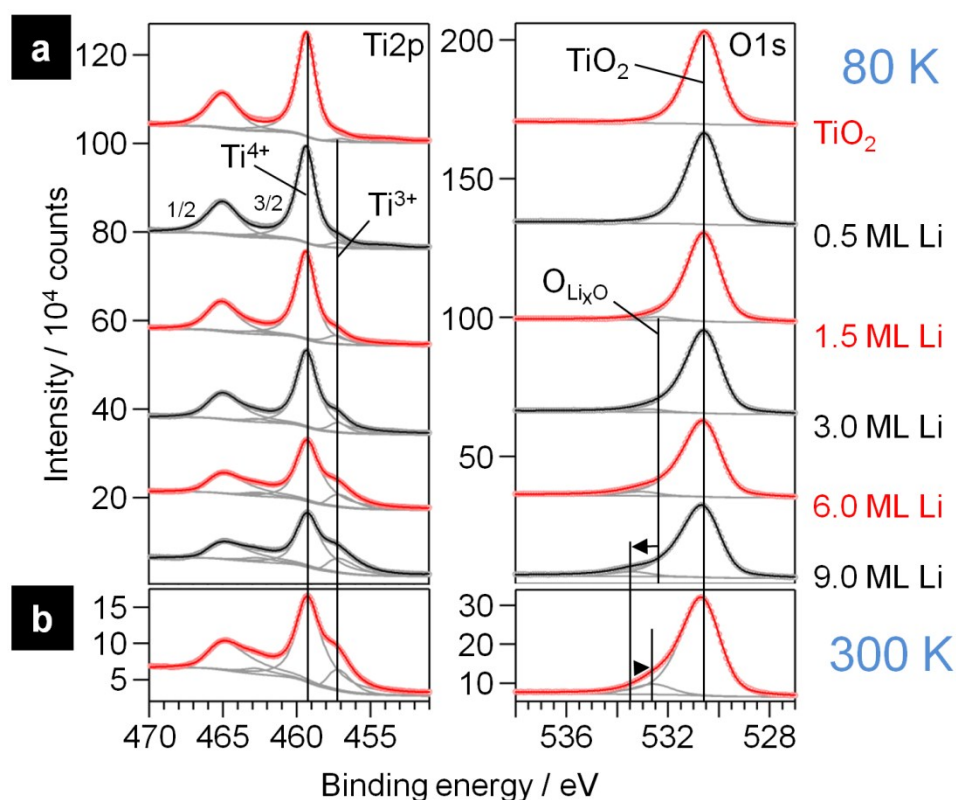

Figure S1: (a) XPS detail spectra from the same experiment as the ones shown in Fig. 4, but taken at 0° detection angle: (a) clean  $\text{TiO}_2$  (topmost spectra) and increasing amounts of Li evaporated onto this surface. (b) XPS spectra recorded after slowly heating the sample overnight to 300 K.

The thickness of the Li<sub>x</sub>O overlayer was calculated following ref. 1:

$$I_{Li_xO} = I_{Li_xO,\infty} \cdot \left[ 1 - \exp\left(-\frac{d}{\lambda_{O1s\ Li_xO, Li_xO} \cos\theta}\right) \right] \quad (1a)$$

$$d = -\lambda_{O1s\ Li_xO, Li_xO} \cdot \cos\theta \cdot \ln\left(1 - \frac{I_{Li_xO}}{I_{Li_xO,\infty}}\right) \quad (1b)$$

where d is the thickness of the overlayer,  $\lambda$  the mean free path of the emitted electrons from the O1s peak in Li<sub>x</sub>O damped by Li<sub>x</sub>O and  $\theta$  the detection angle relative to the surface normal,  $I_{Li_xO,\infty}$  the intensity of the O1s signal of bulk Li<sub>2</sub>O and  $I_{Li_xO}$  the O1s intensity originated by the Li<sub>x</sub>O layer.  $\lambda$  is calculated to be 2.52 nm from the NIST electron effective attenuation length database<sup>2</sup> which is based on calculations by Powell et al. and measurements by Jablonski et al.<sup>3,4</sup>. This gives a mean escape depth of 0.5 nm when measuring at 80°. The mean escape depth is defined following ref. 5.  $\theta$  is corrected for the refraction of the emitted photoelectron wave at the surface barrier from 80° to 77.2° following refs. 6,7.  $I_{Li_xO,\infty}$  is calculated from the bulk O1s rutile signal by taking into account the difference in stoichiometry of oxygen per formula unit, in the density of the materials and in the EALs following ref. 1.

Alternatively the thickness was calculated using the damping of the O1s(LTO) or the Ti2p signals, following ref. 1:

$$I_{LTO} = I_{LTO,\infty} \cdot \exp\left(-\frac{d}{\lambda_{Ti2p/O1s\ LTO, Li_xO} \cos\theta}\right) \quad (2a)$$

$$d = \lambda_{Ti2p/O1s\ LTO, Li_xO} \cdot \cos\theta \cdot \ln\frac{I_{LTO,\infty}}{I_{LTO}} \quad (2b)$$

where  $I_{LTO}$  is the intensity of the Ti<sup>4+</sup>+Ti<sup>3+</sup>/O1s(LTO) peaks,  $I_{LTO,\infty}$  the ones calculated for bulk LTO (analogously to  $I_{Li_xO,\infty}$ ) and  $\lambda_{Ti2p/O1s\ LTO, Li_xO}$  the mean free path of electrons emitted from Ti2p/O1s core levels in LTO in the Li<sub>x</sub>O cover layer.

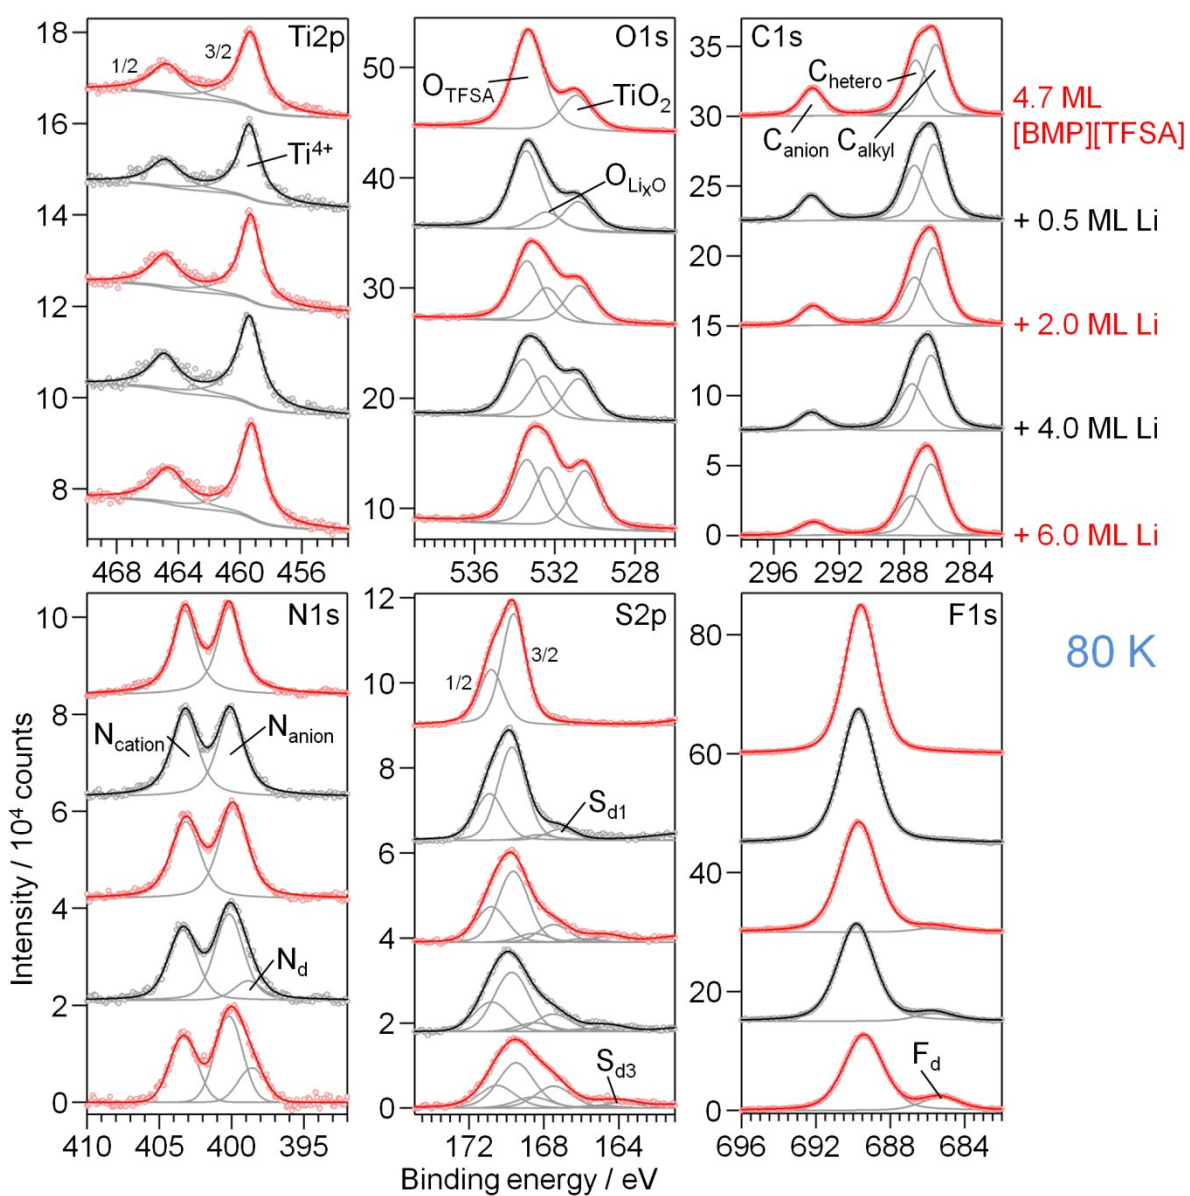

Figure S2: XPS detail spectra of 4.7 ML [BMP][TFSA] deposited on TiO<sub>2</sub>(110) at 80 K (topmost spectra) and step by step post deposition of 6 ML of Li.

## Literature

1. M. P. Seah, S. J. Spencer, *Surf.Interface Anal.*, 2002, **33**(8), 640-652.
2. C.J.Powell, A.Jablonski, NIST Electron Effective-Attenuation-Length Database, Version 1.3, SRD 82, Gaithersburg, MD, **2011**.
3. A. Jablonski, C. J. Powell, *Surf.Sci.Rep.*, 2002, **47**, 33-91.
4. S. Tanuma, C. J. Powell, D. R. Penn, *Surf.Interface Anal.*, 1994, **21**(3), 165-176.
5. A. Jablonski, C. J. Powell, *J.Vac.Sci.Technol.A*, 2003, **21**(1), 274-283.
6. M. Scheffler, K. Kambe, F. Forstmann, *Solid State Commun.*, 1977, **23**(11), 789-794.
7. Carsten Westphal, Zirkularer Dichroismus in der Photoemission von Adsorbaten, **1991**, Thesis/Dissertation.
